# Supplementary material for: Higher Integrin Alpha 3 Beta1 Expression in Papillary Thyroid Cancer Is Associated with Worst Outcome
Source: MDPI journal article supplement (doi:10.3390/cancers13122937), 2021-06-11
Supplement: s1 [file s1]

# Higher Integrin Alpha 3 Beta1 Expression in Papillary Thyroid Cancer is Associated with Worst Outcome

Lorenza Mautone <sup>1,†</sup>, Carlo Ferravante <sup>1,2,†</sup>, Anna Tortora <sup>1</sup>, Roberta Tarallo <sup>1</sup>, Giorgio Giurato <sup>1</sup>, Alessandro Weisz <sup>1,3,\*</sup> and Mario Vitale <sup>1,\*</sup>

**Table S1.** Effect of lymphocytic infiltration on integrin expression assessment.

| Subunit | Pure<br>(n=130) | LI<br>(n=8) | p        |
|---------|-----------------|-------------|----------|
| ITGA1   | 2762            | 3158        | 0,575929 |
| ITGA2   | 7017            | 7024        | 0,997871 |
| ITGA3   | 67902           | 65142       | 0,846751 |
| ITGA4   | 467             | 1190        | 0,007821 |
| ITGA5   | 3622            | 4695        | 0,257799 |
| ITGA6   | 5516            | 5785        | 0,801226 |
| ITGAV   | 19771           | 16538       | 0,485567 |
| ITGB1   | 15042           | 15444       | 0,907481 |
| ITGAD   | 21              | 110         | 0,00025  |
| ITGAL   | 996             | 2825        | 0,007758 |
| ITGAM   | 988             | 2472        | 0,000208 |
| ITGAX   | 1241            | 3556        | 0,000125 |
| ITGB2   | 5397            | 13579       | 0,000245 |

Pure, PTC without lymphocytic infiltration; LI, PTC with 40%-15% lymphocytic infiltration; p, t-student

**Table S2.** Effect of stromal cells infiltration on integrin expression assessment.

| Subunit | Pure (N=60) | SC<br>(N=53) | p      |
|---------|-------------|--------------|--------|
| ITGA1   | 2271        | 2975         | 0,0054 |
| ITGA2   | 7908        | 8423         | 0,6712 |
| ITGA3   | 73486       | 71338        | 0,6877 |
| ITGA4   | 381         | 576          | 0,0378 |
| ITGA5   | 3105        | 4421         | 0,0006 |
| ITGA6   | 4889        | 5792         | 0,0277 |
| ITGAV   | 20508       | 20442        | 0,9707 |
| ITGB1   | 14418       | 16307        | 0,1835 |

Pure, PTC with >94% tumor cells; SC, PTC with >30% stromal cells; p, t-student
